# Supplementary material for: Reversible photoactivation in coordination polymer-derived CdS/Co–N species composites for enhanced photocatalytic hydrogen evolution
Source: Royal Society of Chemistry journal article supplement (doi:10.1039/d0se00167h), 2020-01-01
Supplement: d0se00167h1.pdf [file d0se00167h1.pdf]

1 ***Electronic Supplementary Information***

2 **Reversible Photoactivation in Coordination Polymer-derived CdS/Co-N Species**

3 **Composites for Enhanced Photocatalytic Hydrogen Evolution**

4 Yuxiao Guo<sup>†</sup>, Yawei Yang<sup>†</sup>, Xingtian Yin<sup>\*</sup>, Jie Liu, and Wenxiu Que<sup>\*</sup>

5 *Electronic Materials Research Laboratory, Key Laboratory of the Ministry of Education &*  
6 *International Center for Dielectric Research, and Shaanxi Engineering Research Center of Advanced*  
7 *Energy Materials and Devices, School of Electronic Science and Engineering, Xi'an Jiaotong*  
8 *University, Xi'an 710049, P. R. China*

9 <sup>†</sup> These authors contributed equally to this work.

10 <sup>\*</sup> Corresponding authors: xt\_yin@mail.xjtu.edu.cn (X. Yin) wxque@mail.xjtu.edu.cn (W. Que)

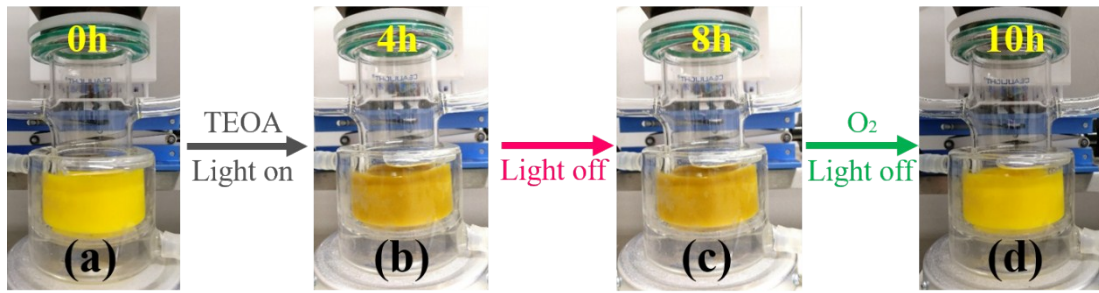

1

2 **Fig. S1** Photos of the  $\text{Cd}_3\text{TMT}_2\text{-400}$  sample during HER process: (a) initial state, (b) after 4 h irradiation,

3 (c) after another 4 h without irradiation, and (d) after another 2 h  $\text{O}_2$  introduction.

4

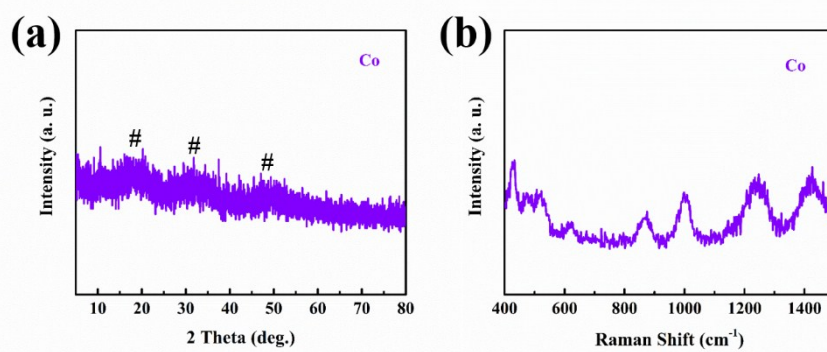

5

6 **Fig. S2** (a) XRD pattern and (b) Raman spectra of the  $\text{Co}_3(\text{TMT})_2$  coordination polymer.

7

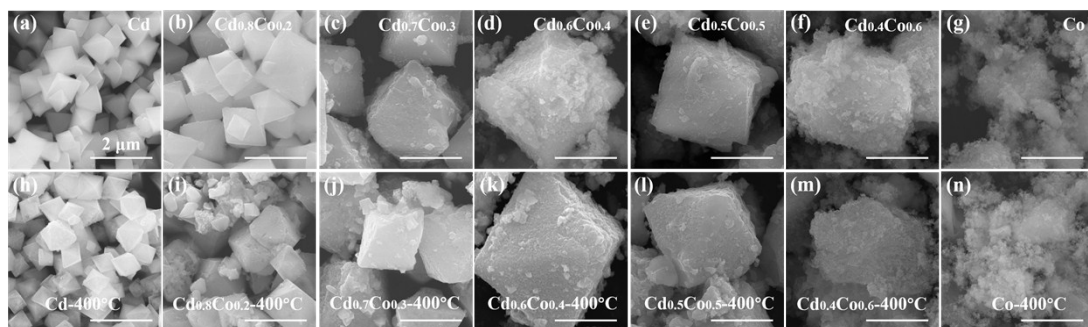

8

9 **Fig. S3** SEM images of the  $(\text{Cd}_{1-x}\text{Co}_x)_3\text{TMT}_2$  coordination polymers and the corresponding 400 °C

10 pyrolysis products.

11

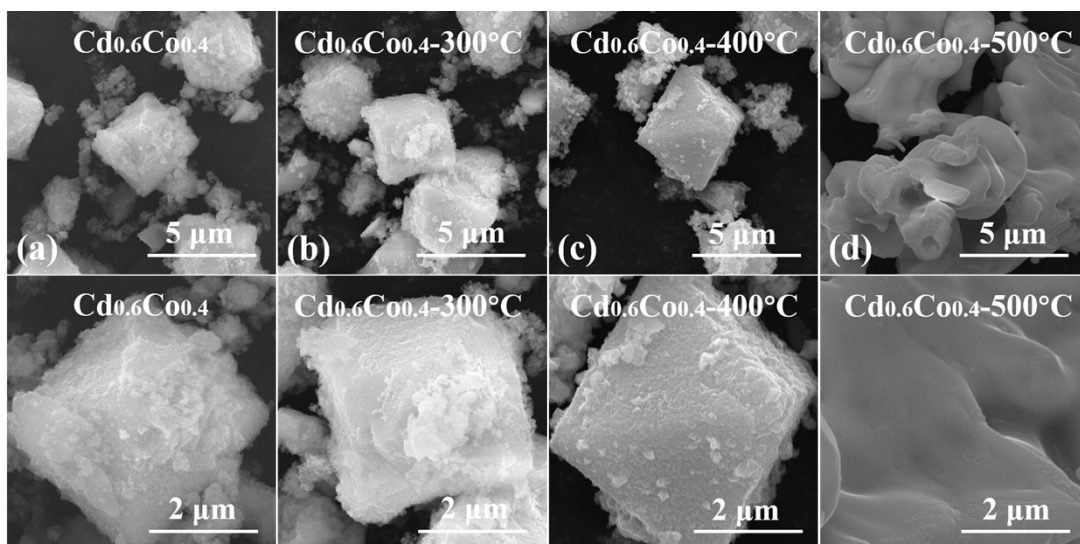

1

2 **Fig. S4** SEM images of the  $(\text{Cd}_{0.6}\text{Co}_{0.4})_3\text{TMT}_2$  coordination polymers and corresponding pyrolysis  
 3 products.

4

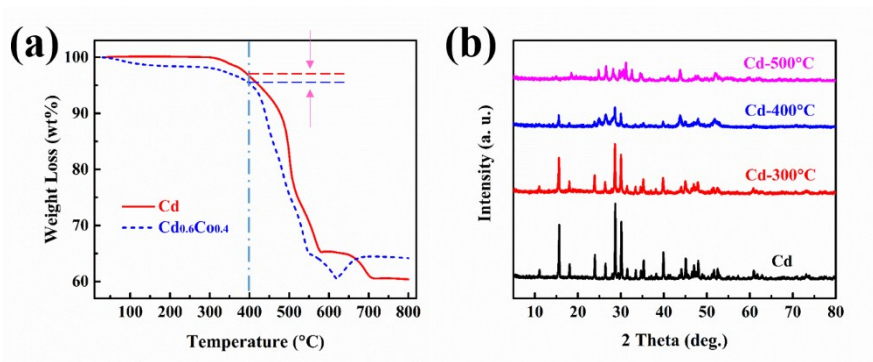

5

6 **Fig. S5** (a) TGA curves of the  $\text{Cd}_3\text{TMT}_2$  and  $(\text{Cd}_{0.6}\text{Co}_{0.4})_3\text{TMT}_2$  coordination polymers in air, and (b)  
 7 XRD patterns of the  $\text{Cd}_3\text{TMT}_2$  pyrolysis products.

8

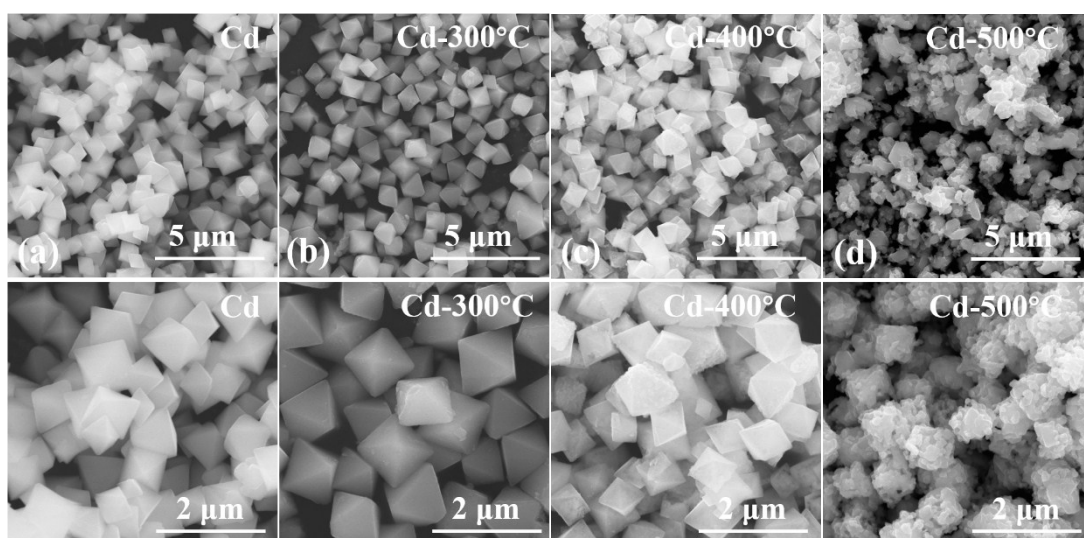

1

2 **Fig. S6** SEM images of the  $\text{Cd}_3\text{TMT}_2$  coordination polymers and corresponding pyrolysis products.

3

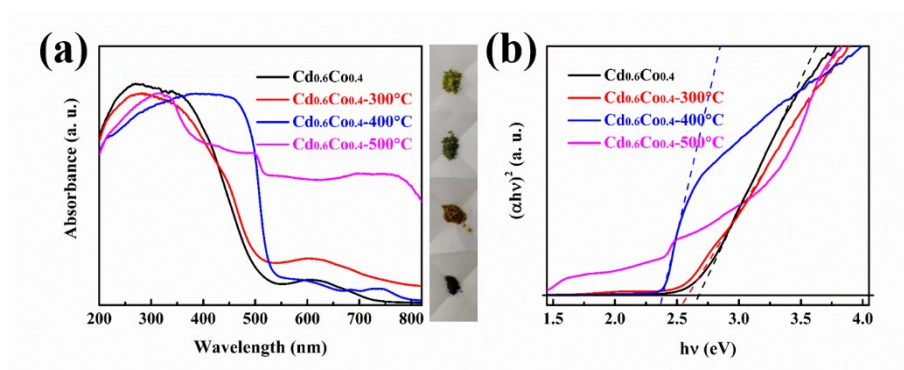

4

5 **Fig. S7** (a) UV-vis diffuse reflectance absorption spectra and (b) estimated bandgaps of the  
6  $(\text{Cd}_{0.6}\text{Co}_{0.4})_3\text{TMT}_2$  pyrolysis products.

7

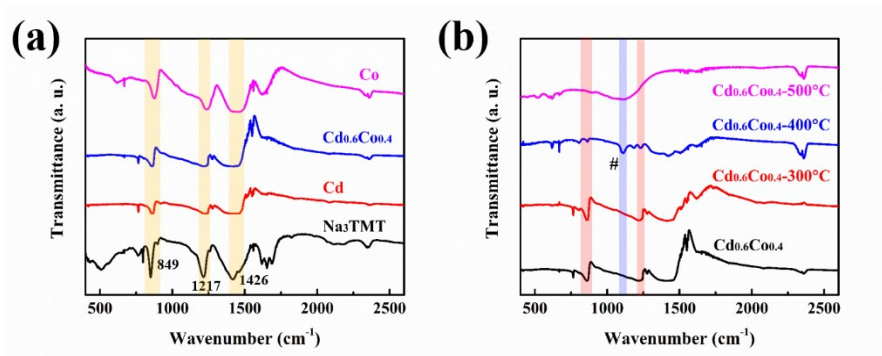

8

9 **Fig. S8** FTIR spectra of (a) the  $(\text{Cd}_{1-x}\text{Co}_x)_3\text{TMT}_2$  coordination polymers and (b) the  $(\text{Cd}_{0.6}\text{Co}_{0.4})_3\text{TMT}_2$   
10 pyrolysis products.

11

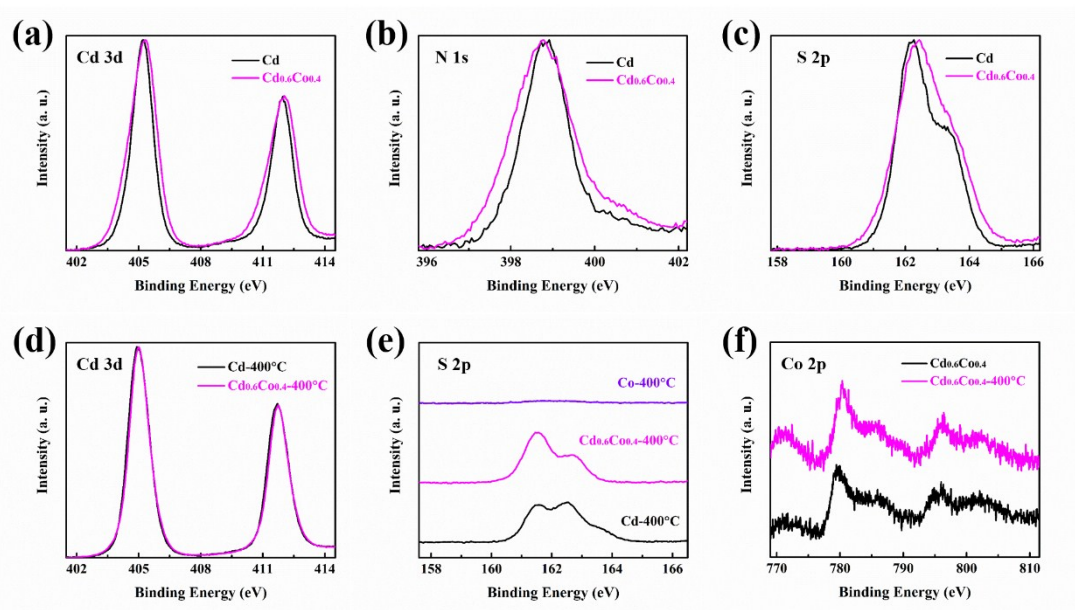

1

2 **Fig. S9** XPS spectra of the  $\text{Cd}_3\text{TMT}_2$ ,  $(\text{Cd}_{0.6}\text{Co}_{0.4})_3\text{TMT}_2$ , and  $\text{Co}_3\text{TMT}_2$  coordination polymers and their  
 3 corresponding 400 °C pyrolysis products: (a) and (d) Cd 3d, (b) N 1s, (c) and (e) S 2p, and (f) Co 2p  
 4 regions.

5

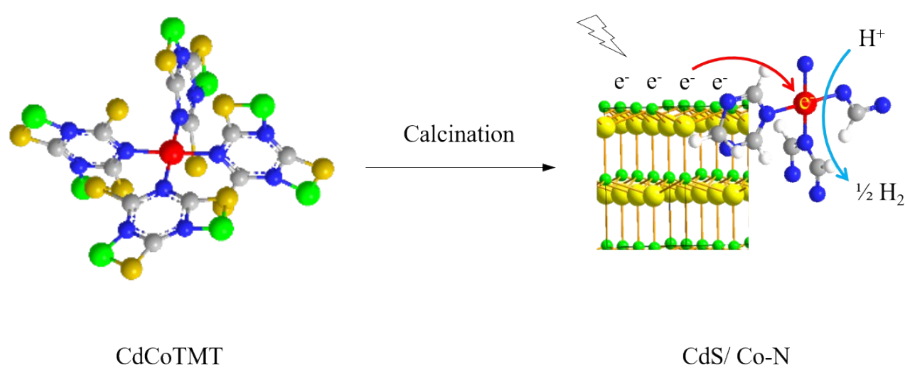

6

7 **Fig. S10** Structural diagrams for the  $(\text{Cd}_{0.6}\text{Co}_{0.4})_3\text{TMT}_2$  coordination polymer and the corresponding 400  
 8 °C pyrolysis product.

9

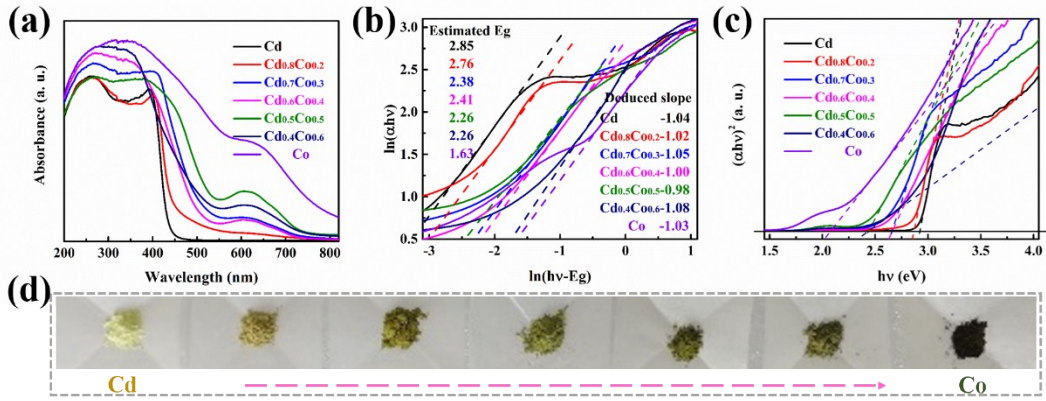

1

2 **Fig. S11** (a) UV-vis diffuse reflectance absorption spectra, (b) corresponding  $\ln(ahv)$  vs.  $\ln(hv-Eg)$  plots,  
 3 (c) estimated bandgaps and (d) photos of the  $(Cd_{1-x}Co_x)_3TMT_2$  coordination polymers.

4

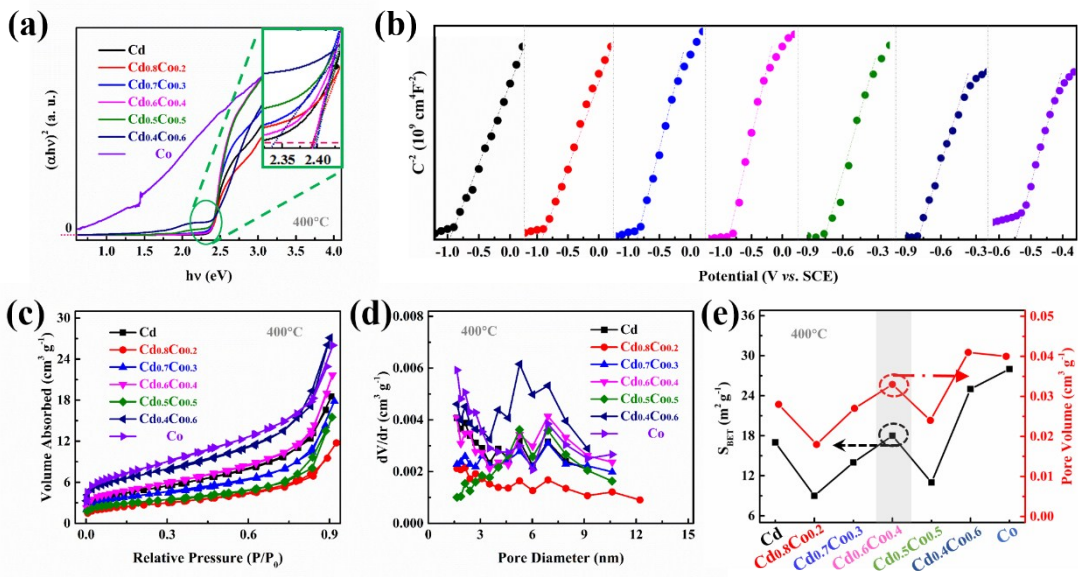

5

6 **Fig. S12** (a) Estimated bandgaps, (b) Mott-Schottky plots, and (c-e) Nitrogen adsorption-desorption  
 7 isotherm and Barrett-Joyner-Halenda (BJH) pore size distribution of the  $(Cd_{1-x}Co_x)_3TMT_2-400$  samples.

8

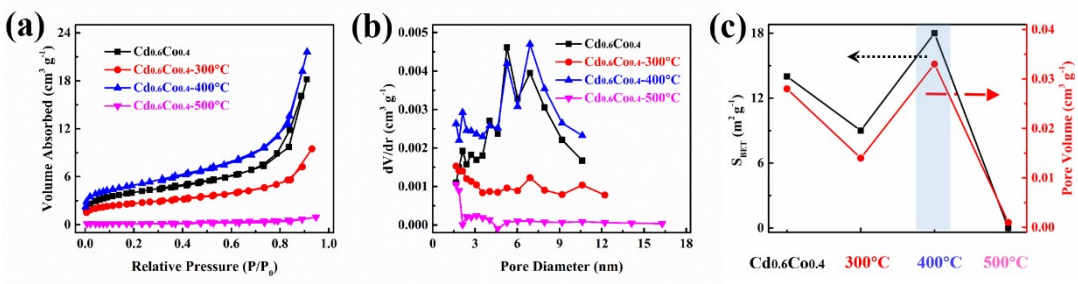

9

10 **Fig. S13** (a-c) Nitrogen adsorption-desorption isotherm and Barrett-Joyner-Halenda (BJH) pore size

1 distribution of the  $(\text{Cd}_{0.6}\text{Co}_{0.4})_3\text{TMT}_2$  pyrolysis products.

2

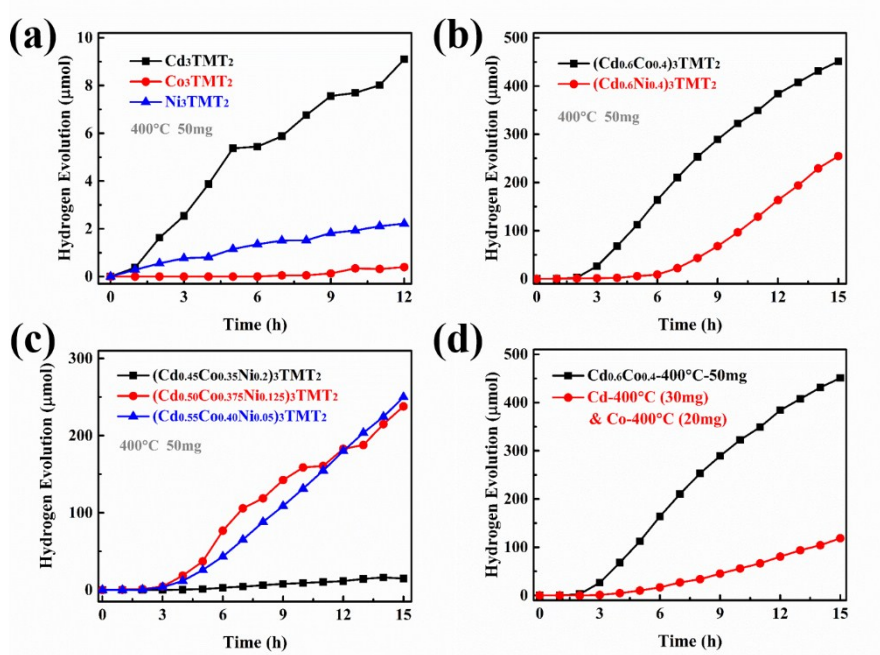

3

4 **Fig. S14** Photocatalytic hydrogen evolution amounts of the 400 °C pyrolysis products from: (a) the  
5  $\text{Cd}_3\text{TMT}_2$ ,  $\text{Co}_3\text{TMT}_2$  and  $\text{Ni}_3\text{TMT}_2$ , (b) the  $(\text{Cd}_{0.6}\text{Co}_{0.4})_3\text{TMT}_2$  and  $(\text{Cd}_{0.6}\text{Ni}_{0.4})_3\text{TMT}_2$ , and (c) the  
6  $(\text{Cd}_{0.45}\text{Co}_{0.35}\text{Ni}_{0.2})_3\text{TMT}_2$ ,  $(\text{Cd}_{0.50}\text{Co}_{0.375}\text{Ni}_{0.125})_3\text{TMT}_2$  and  $(\text{Cd}_{0.55}\text{Co}_{0.40}\text{Ni}_{0.05})_3\text{TMT}_2$ ; (d) Hydrogen  
7 evolution of the  $(\text{Cd}_{0.6}\text{Ni}_{0.4})_3\text{TMT}_2\text{-}400$  and mechanically mixed  $\text{Co}_3\text{TMT}_2\text{-}400/\text{Cd}_3\text{TMT}_2\text{-}400 = 4/6$   
8 sample.

9

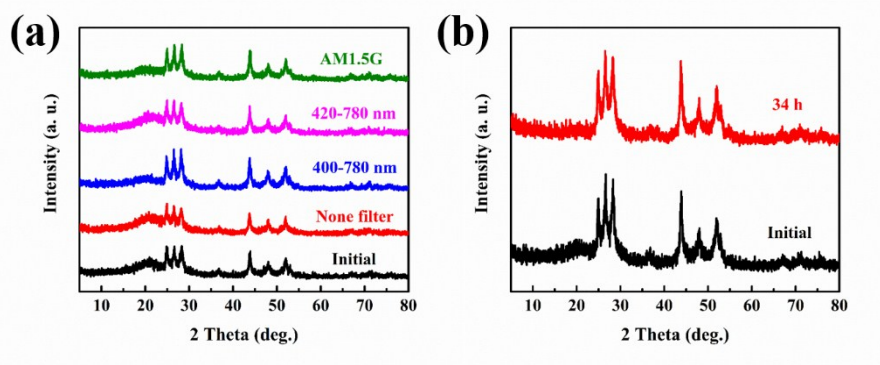

10

11 **Fig. S15** XRD patterns of the  $(\text{Cd}_{0.6}\text{Co}_{0.4})_3\text{TMT}_2\text{-}400$  samples before and after photocatalytic hydrogen  
12 evolution reaction: (a) under various light spectra: none, 400-780 nm, 420-780 nm and AM1.5G filters,  
13 and (b) after 34 h reaction.

14

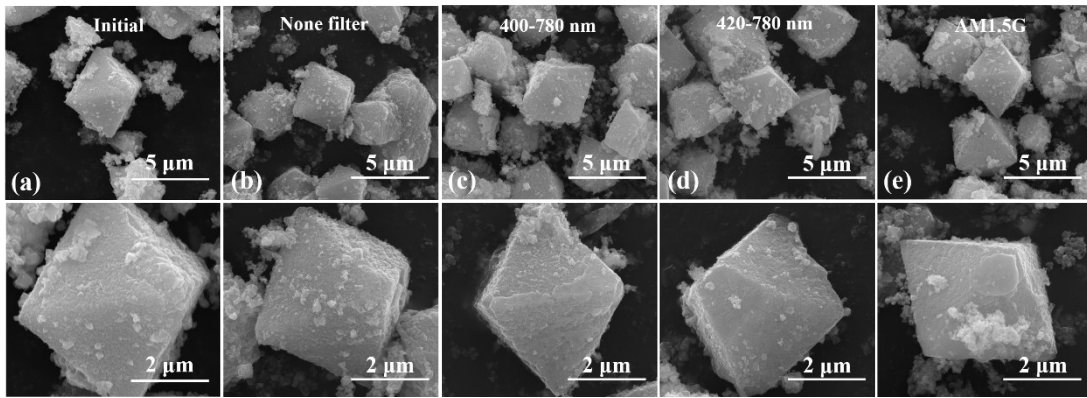

1

2 **Fig. S16** SEM images of the  $(\text{Cd}_{0.6}\text{Co}_{0.4})_3\text{TMT}_2\text{-400}$  samples before and after photocatalytic hydrogen  
 3 evolution reaction under various light spectra: none, 400-780 nm, 420-780 nm and AM1.5G filters.

4

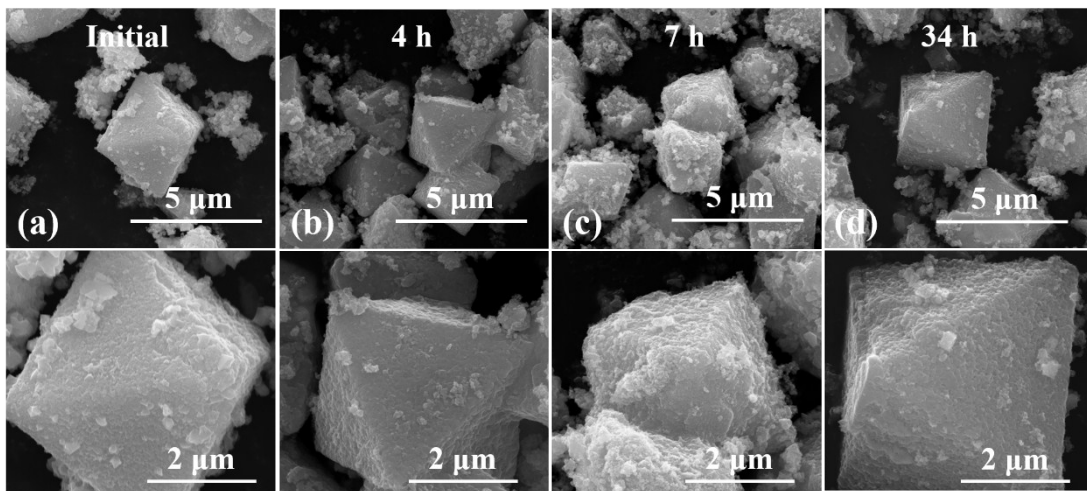

5

6 **Fig. S17** SEM images of the  $(\text{Cd}_{0.6}\text{Co}_{0.4})_3\text{TMT}_2\text{-400}$  samples before and after photocatalytic hydrogen  
 7 evolution reaction for 4 h, 7 h and 34 h.

8

9



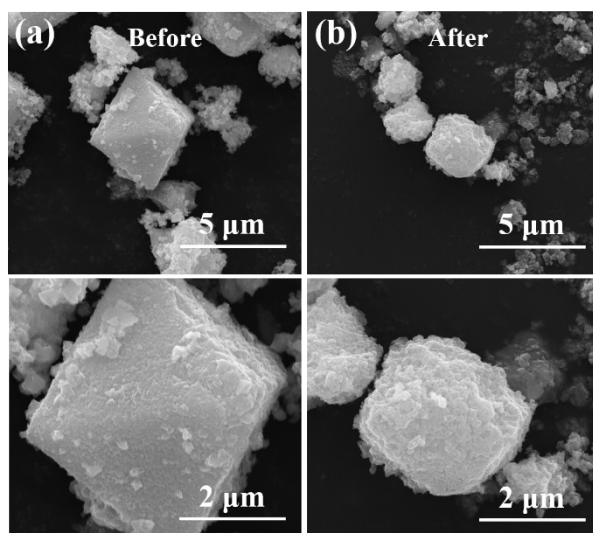

1

2 **Fig. S18** SEM images of the  $(\text{Cd}_{0.6}\text{Co}_{0.4})_3\text{TMT}_2\text{-400}$  samples (a) before and (b) after 180 h running.

3

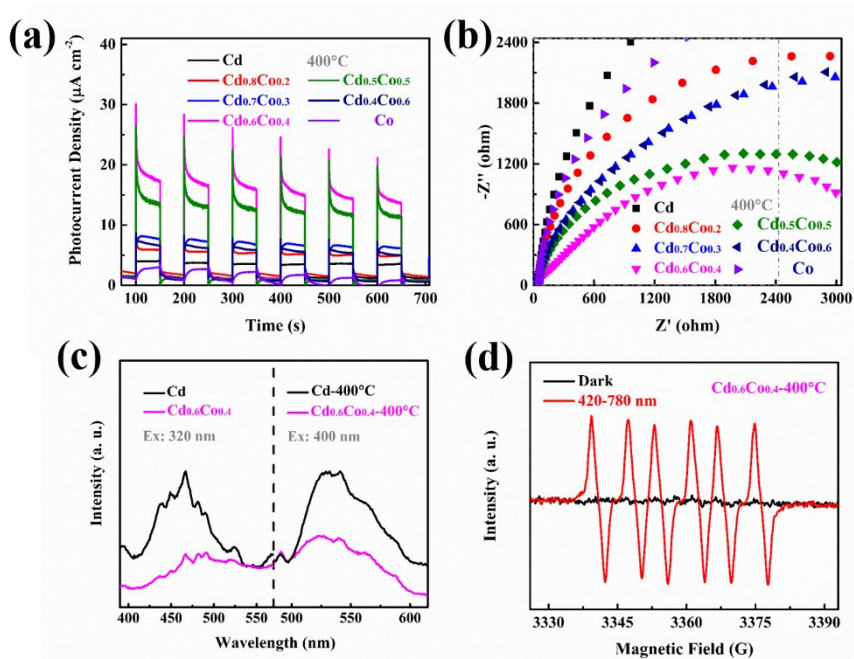

4

5 **Fig. S19** (a) Photocurrent responses and (b) electrochemical Nyquist plots of the  $(\text{Cd}_{1-x}\text{Co}_x)_3\text{TMT}_2\text{-400}$

6 samples; (c) steady-state PL spectra of the  $\text{Cd}_3\text{TMT}_2$  and  $(\text{Cd}_{0.6}\text{Co}_{0.4})_3\text{TMT}_2$  and their corresponding 400

7  $^\circ\text{C}$  pyrolysis products; (d) DMPO-trapped ESR spectra for the  $(\text{Cd}_{0.6}\text{Co}_{0.4})_3\text{TMT}_2\text{-400}$  sample.

8

9

10

11

1 **Table S1** The exact Co<sup>2+</sup>/Cd<sup>2+</sup> ratios of the (Cd<sub>1-x</sub>Co<sub>x</sub>)<sub>3</sub>TMT<sub>2</sub>-400 samples calculated from XPS results.

| Sample       | Cd    | Cd <sub>0.8</sub> Co <sub>0.2</sub> | Cd <sub>0.7</sub> Co <sub>0.3</sub> | Cd <sub>0.6</sub> Co <sub>0.4</sub> | Cd <sub>0.5</sub> Co <sub>0.5</sub> | Cd <sub>0.4</sub> Co <sub>0.6</sub> | Co    |
|--------------|-------|-------------------------------------|-------------------------------------|-------------------------------------|-------------------------------------|-------------------------------------|-------|
| Co/Cd        |       |                                     |                                     |                                     |                                     |                                     |       |
| atomic ratio | 0/100 | 5/95                                | 6/94                                | 8/92                                | 10/90                               | 15/85                               | 100/0 |

2

3 **Table S2** The specific surface area and pore volume of the (Cd<sub>0.6</sub>Co<sub>0.4</sub>)<sub>3</sub>TMT<sub>2</sub> pyrolysis products.

| Sample                                             | Cd <sub>0.6</sub> Co <sub>0.4</sub> | Cd <sub>0.6</sub> Co <sub>0.4</sub> -300 | Cd <sub>0.6</sub> Co <sub>0.4</sub> -400 | Cd <sub>0.6</sub> Co <sub>0.4</sub> -500 |
|----------------------------------------------------|-------------------------------------|------------------------------------------|------------------------------------------|------------------------------------------|
| S <sub>BET</sub> (m <sup>2</sup> g <sup>-1</sup> ) | 14                                  | 9                                        | 18                                       | almost 0                                 |
| Pore volume (cm <sup>3</sup> g <sup>-1</sup> )     | 0.028                               | 0.014                                    | 0.033                                    | 0.001                                    |

4

5 **Table S3** The specific surface area and pore volume of the (Cd<sub>1-x</sub>Co<sub>x</sub>)<sub>3</sub>TMT<sub>2</sub>-400 pyrolysis products.

| Sample                                             | Cd    | Cd <sub>0.8</sub> Co <sub>0.2</sub> | Cd <sub>0.7</sub> Co <sub>0.3</sub> | Cd <sub>0.6</sub> Co <sub>0.4</sub> | Cd <sub>0.5</sub> Co <sub>0.5</sub> | Cd <sub>0.4</sub> Co <sub>0.6</sub> | Co    |
|----------------------------------------------------|-------|-------------------------------------|-------------------------------------|-------------------------------------|-------------------------------------|-------------------------------------|-------|
| S <sub>BET</sub> (m <sup>2</sup> g <sup>-1</sup> ) | 17    | 9                                   | 14                                  | 18                                  | 11                                  | 25                                  | 28    |
| Pore volume (cm <sup>3</sup> g <sup>-1</sup> )     | 0.028 | 0.018                               | 0.027                               | 0.033                               | 0.024                               | 0.041                               | 0.040 |

6

7

8 **Kinetics fitting in Cd<sub>3</sub>TMT<sub>2</sub>-400, Cd<sub>3</sub>TMT<sub>2</sub>-400+MV<sup>2+</sup>, Cd<sub>3</sub>TMT<sub>2</sub>-400+PTZ and**  
 9 **(Cd<sub>0.6</sub>Co<sub>0.4</sub>)<sub>3</sub>TMT<sub>2</sub>-400 samples.**

10 The XB and PA kinetics can be fitted to a triple-exponential decay:

$$11 \text{ XB}(t) \text{ or PA}(t) = A_1 * e^{-t/\tau_1} + A_2 * e^{-t/\tau_2} + A_3 * e^{-t/\tau_3} \quad (S1)$$

12 where A<sub>i</sub> and τ<sub>i</sub> are the relative amplitude and time constant for the i-th component. The fitting parameters  
 13 are listed in Table S4.

14 The averaged charge transfer and recombination time constants (τ<sub>ave</sub>) are calculated using the following  
 15 expression:

$$16 \tau_{ave} = (\tau_1 * A_1 + \tau_2 * A_2 + \tau_3 * A_3) / (A_1 + A_2 + A_3) \quad (S2)$$

17

18 **Table S4** Fitting Parameters for the Cd<sub>3</sub>TMT<sub>2</sub>-400, Cd<sub>3</sub>TMT<sub>2</sub>-400+MV<sup>2+</sup>, Cd<sub>3</sub>TMT<sub>2</sub>-400+PTZ and  
 19 (Cd<sub>0.6</sub>Co<sub>0.4</sub>)<sub>3</sub>TMT<sub>2</sub>-400 samples.

| Sample                                                                    | Signal | $\tau_1$ (ps)/<br>$A_1$ | $\tau_2$ (ps)/<br>$A_2$ | $\tau_3$ (ps)/<br>$A_3$ | $\tau_{ave}$ (ps) | $\tau_{1/2}$ (ps) |
|---------------------------------------------------------------------------|--------|-------------------------|-------------------------|-------------------------|-------------------|-------------------|
| Cd <sub>3</sub> TMT <sub>2</sub> -400                                     | XB     | 12.4/<br>-0.15          | 132.8/<br>-0.24         | 1137.6/<br>-0.28        | 526               | 737               |
|                                                                           | PA     | 5.8/<br>0.18            | 76.4/<br>0.26           | 615.6/<br>0.26          | 259               | 201               |
| Cd <sub>3</sub> TMT <sub>2</sub> -400+MV <sup>2+</sup>                    | XB     | 9.0/<br>-0.18           | 84.0/<br>-0.33          | 699.3/<br>-0.36         | 323               | 135               |
|                                                                           | PA     | 7.8/<br>0.23            | 52.0/<br>0.20           | 497.2/<br>0.25          | 201               | 259               |
| Cd <sub>3</sub> TMT <sub>2</sub> -400+PTZ                                 | XB     | 29.7/<br>-0.18          | 629.2/<br>-0.45         | 629.2/<br>0.06          | 440               | 954               |
|                                                                           | PA     | 4.1/<br>2.09            | 4.1/<br>-1.83           | 163.9/<br>0.31          | 91                | 74                |
| (Cd <sub>0.6</sub> Co <sub>0.4</sub> ) <sub>3</sub> TMT <sub>2</sub> -400 | XB     | 6.5/<br>-0.20           | 68.2/<br>-0.21          | 607.1/<br>-0.32         | 288               | 370               |
|                                                                           | PA     | 1.3/<br>0.38            | 12.3/<br>0.28           | 324.4/<br>0.23          | 88                | 15                |

1
